# Supplementary material for: Hyperphosphatemia increases inflammation to exacerbate anemia and skeletal muscle wasting independently of FGF23-FGFR4 signaling
Source: eLife journal article supplement (doi:10.7554/elife.74782), 2022-03-18

Figure 6-source data 1

A

As shown in manuscript

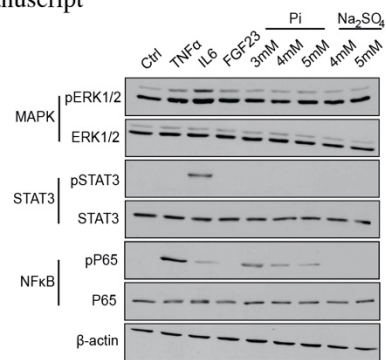

Raw immunoblots

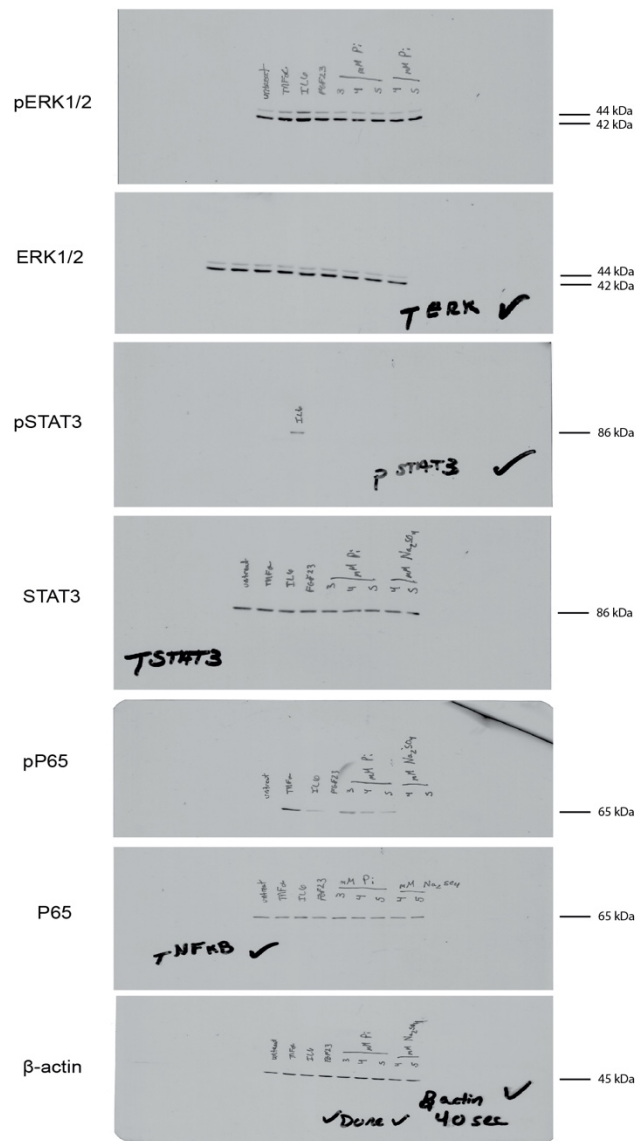

G

As shown in manuscript

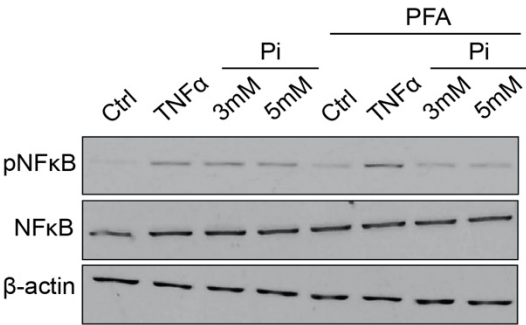

Raw immunoblots

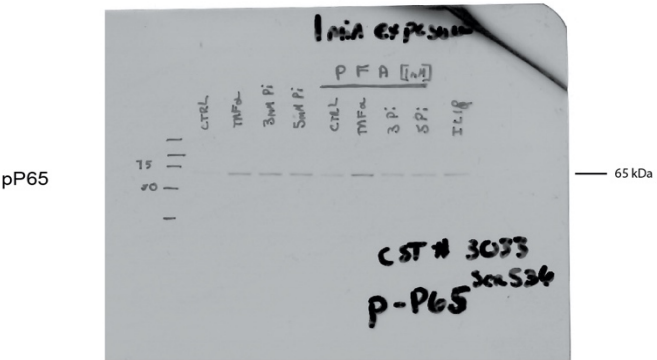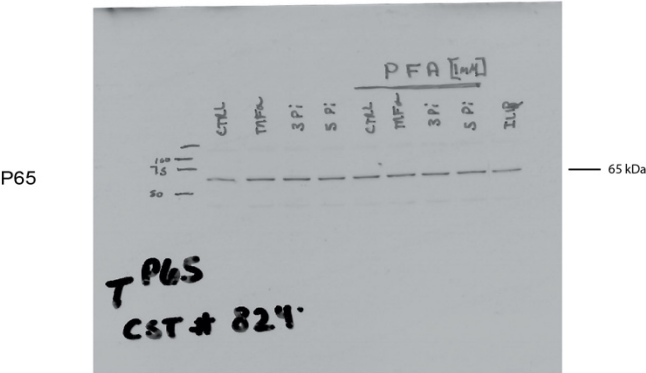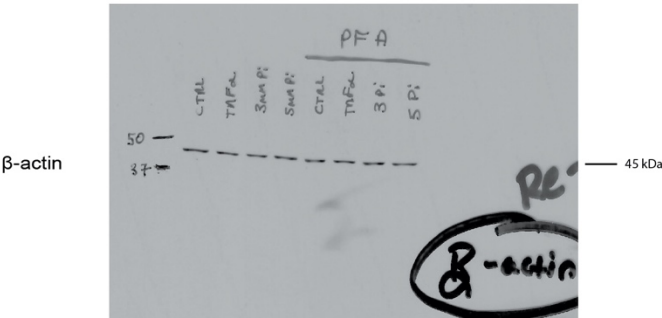

Supplement: supp [file elife-74782-supp-v1.zip]
